# Supplementary material for: Hypoxia-Induced Modulation of Apoptosis and BCL-2 Family Proteins in Different Cancer Cell Types
Source: PubMed Central journal article supplement (PMC3489905; doi:10.1371/journal.pone.0047519), 2012-11-05

# Supplementary figure 1

## Western blots from figure 2

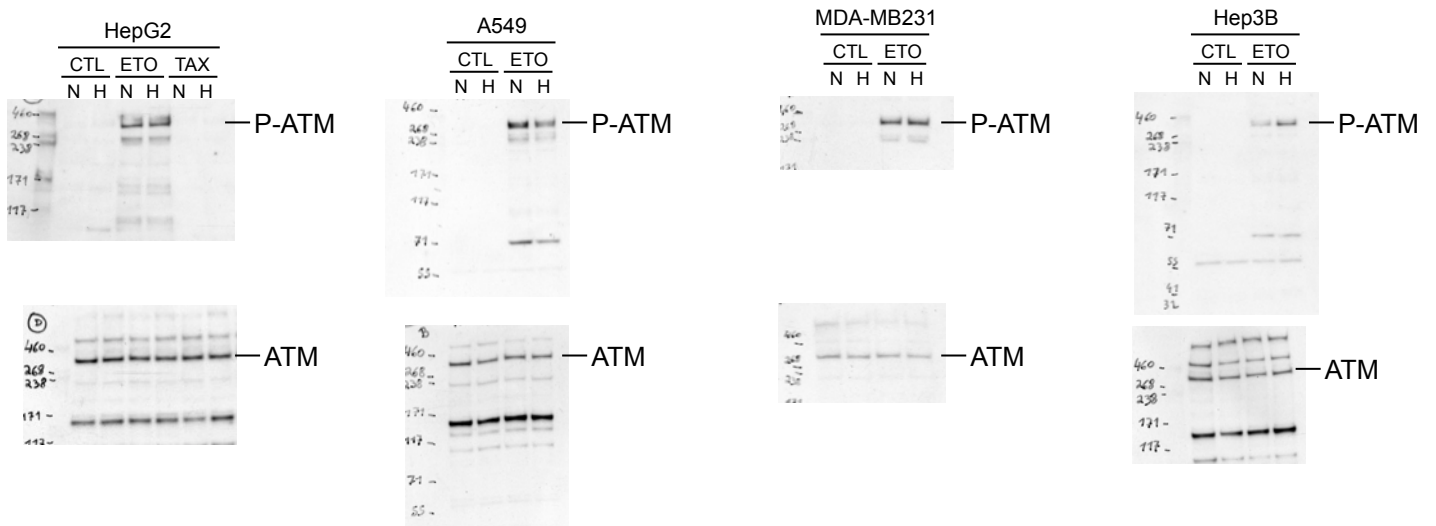

## Western blots from figure 3

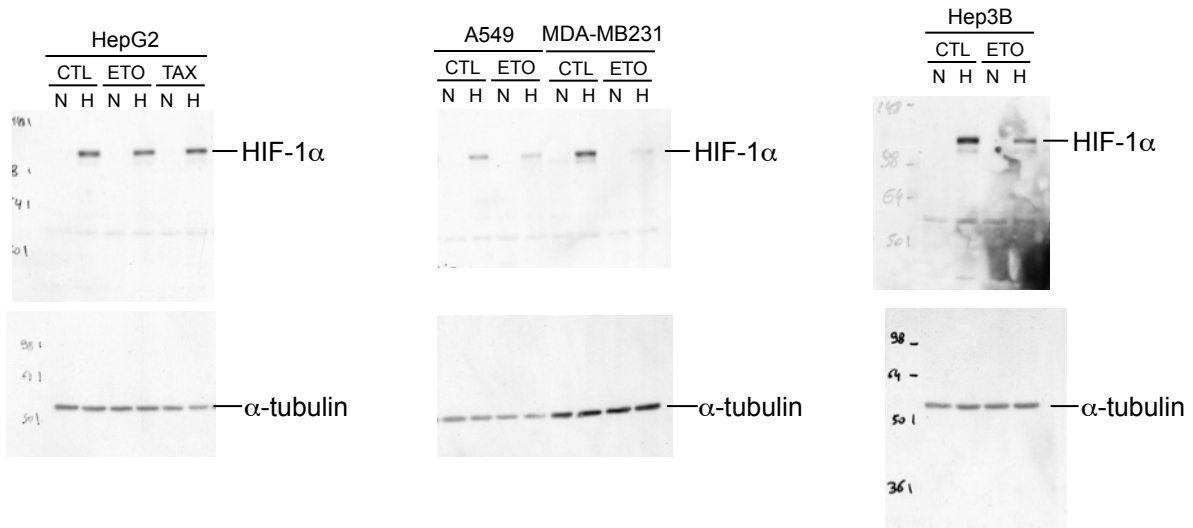

# Western blots from figure 4

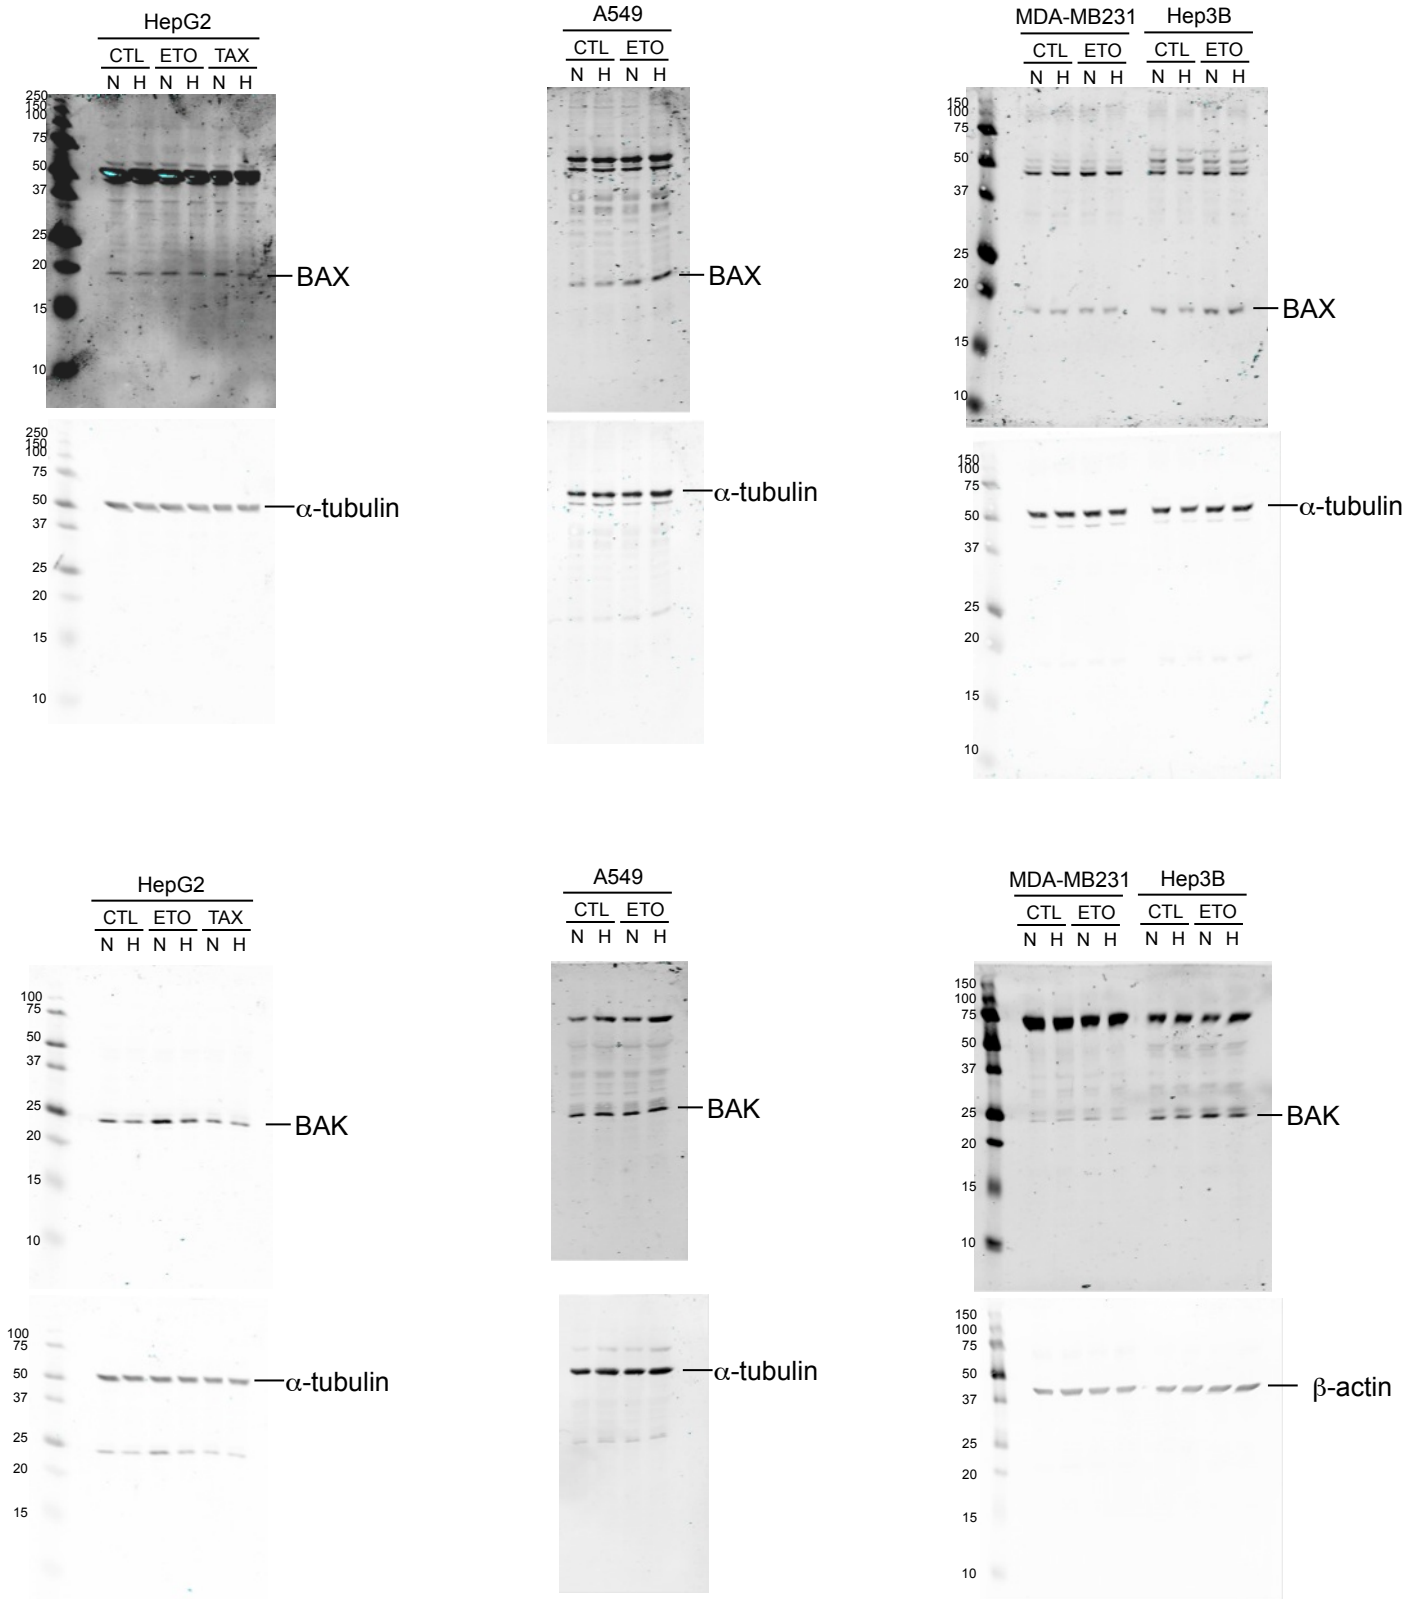

# Western blots from figure 4

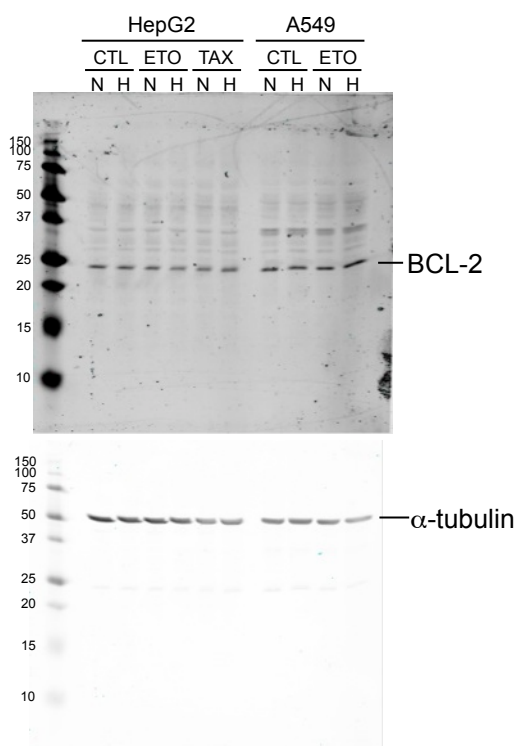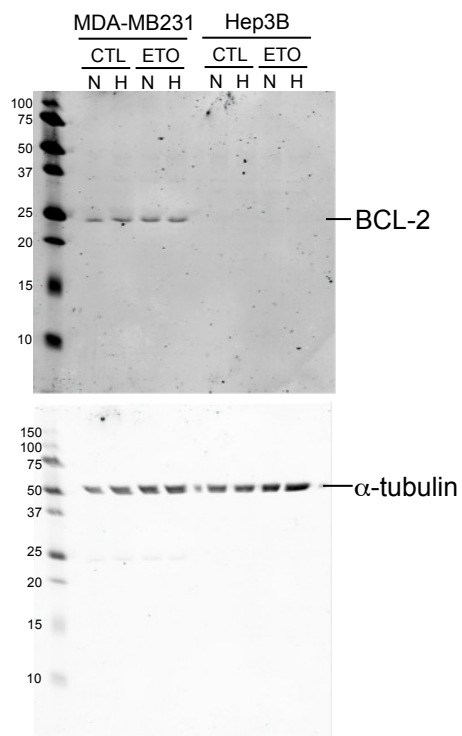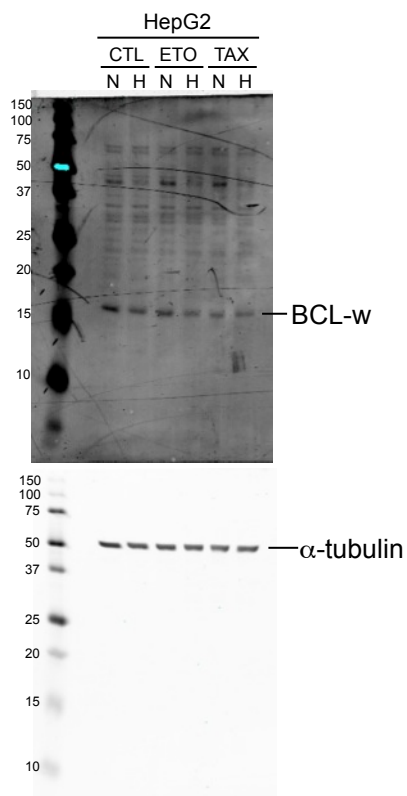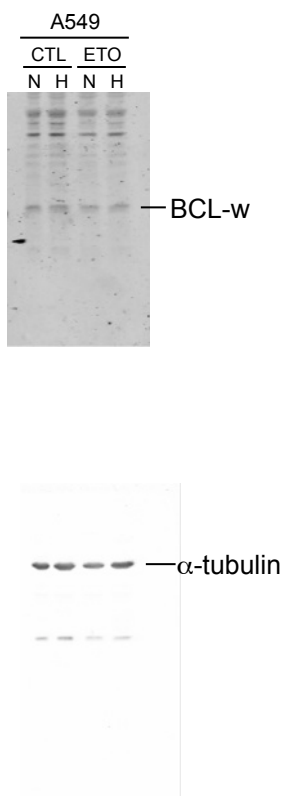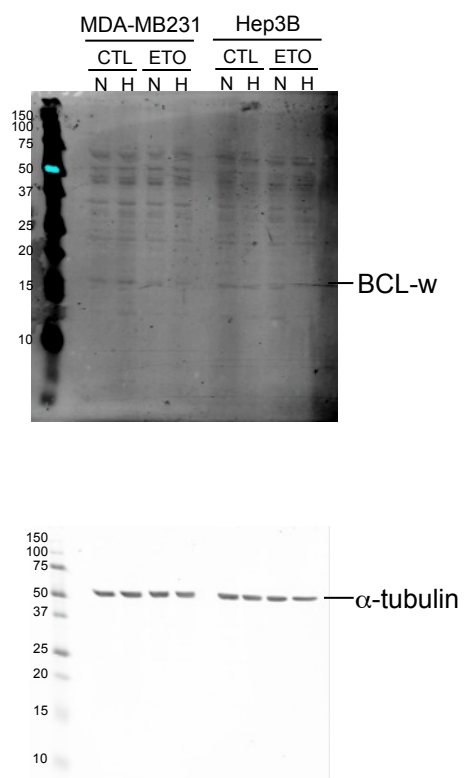

# Western blots from figure 4

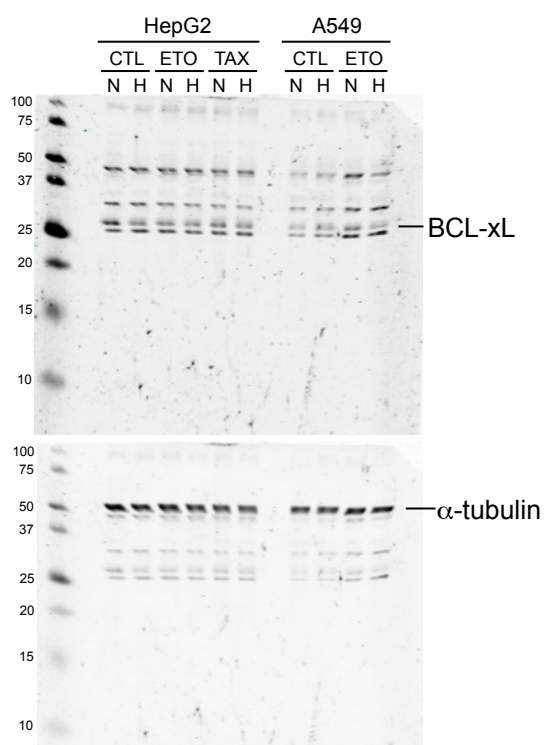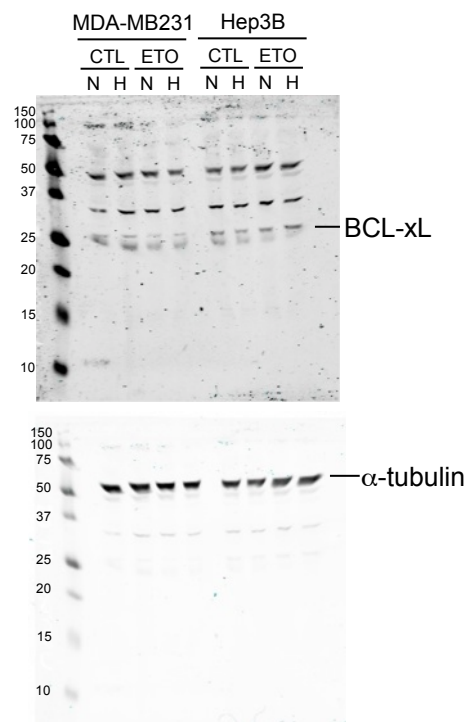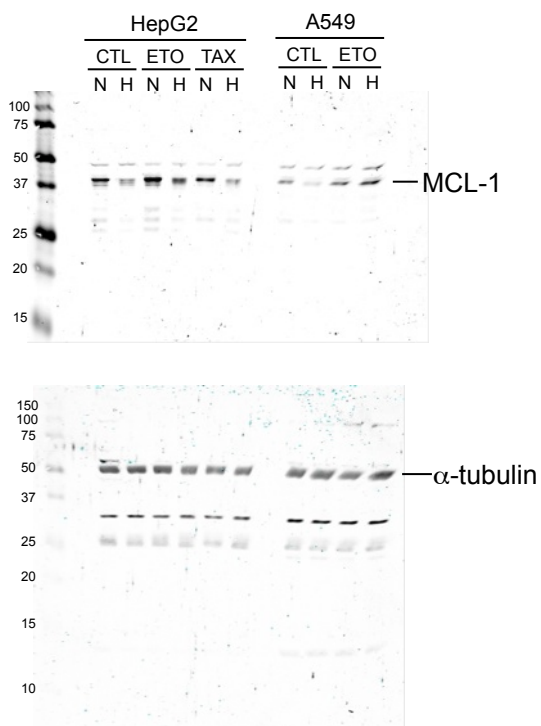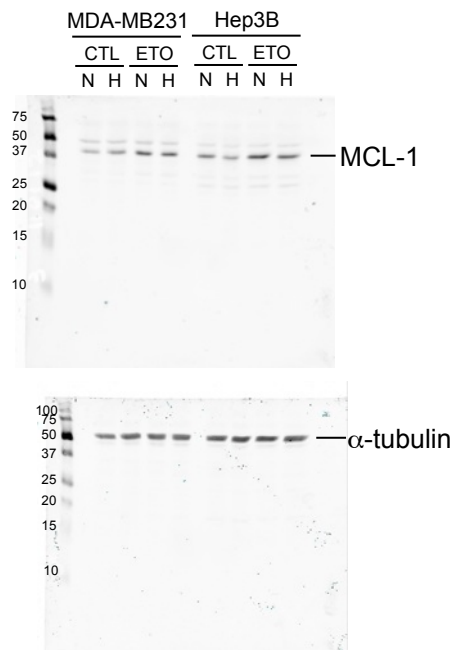



# Western blots from figure 4

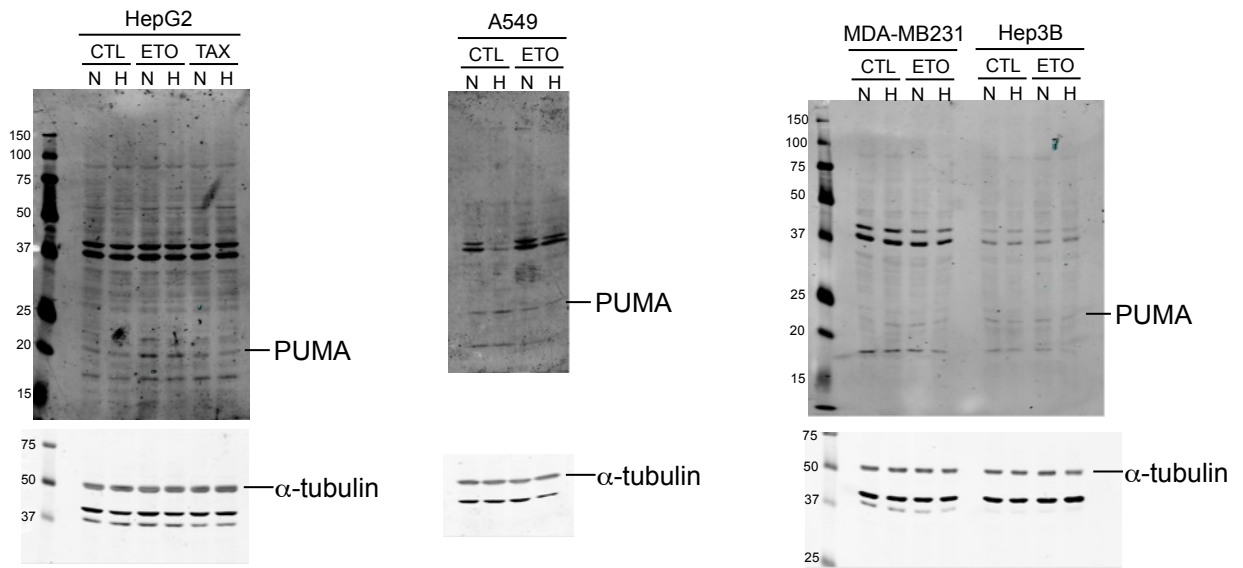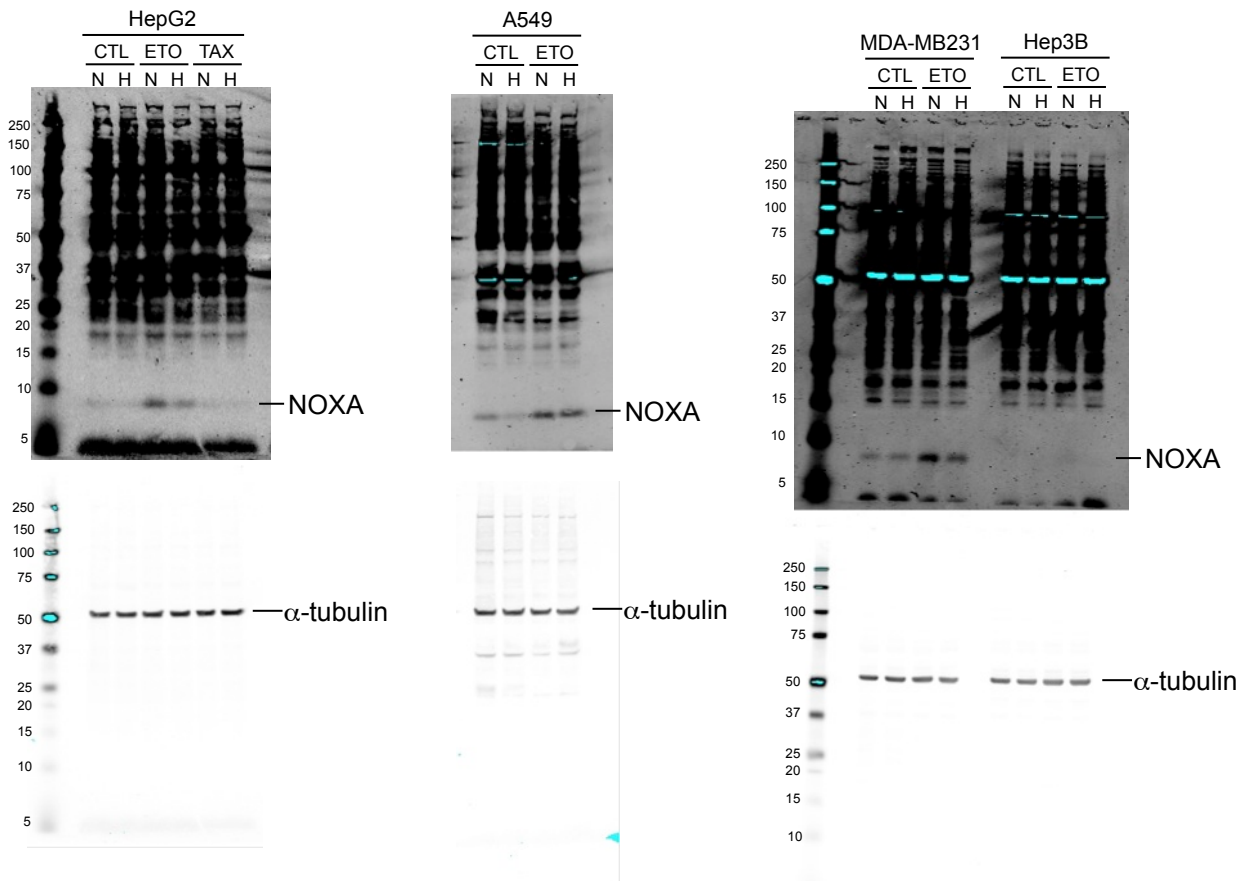

# Western blots from figure 4

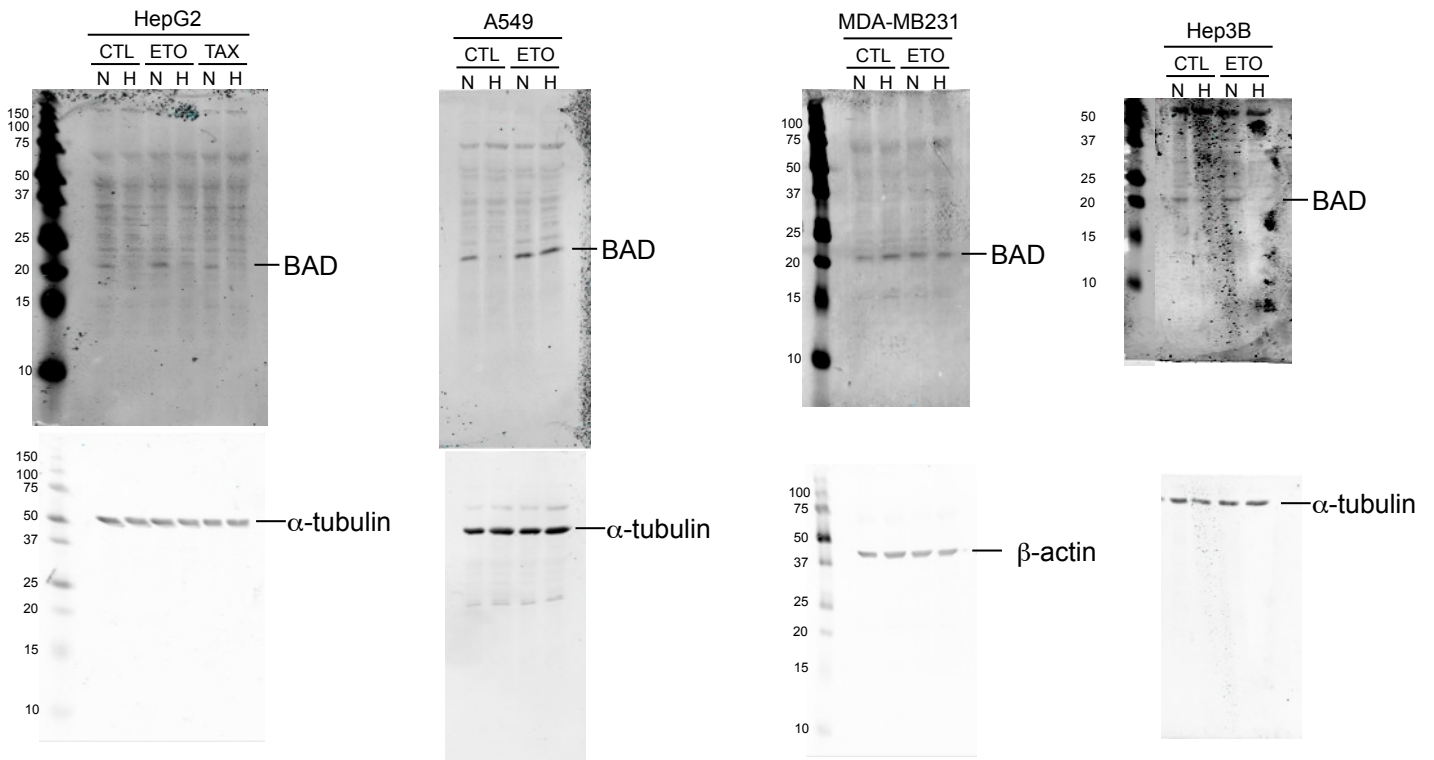

# Western blots from figure 4

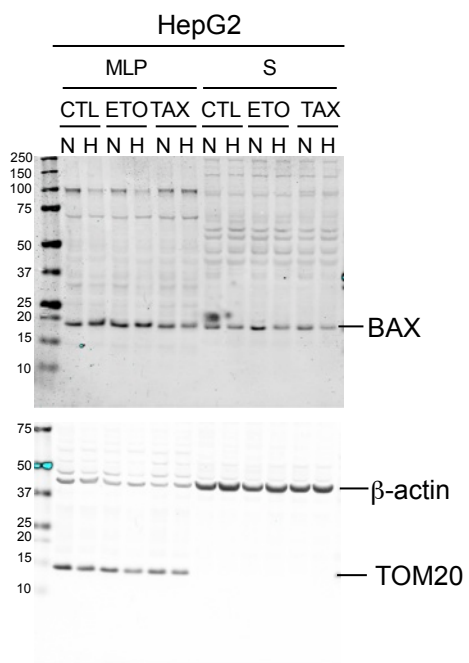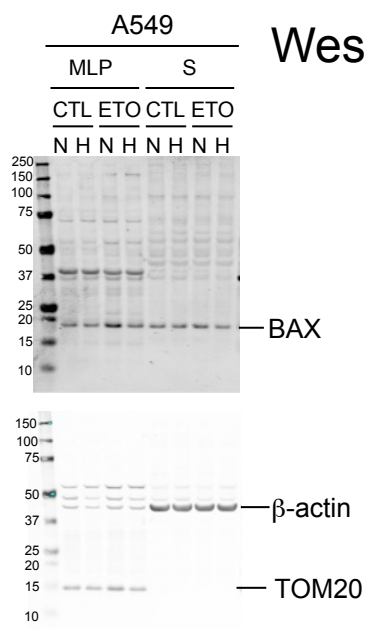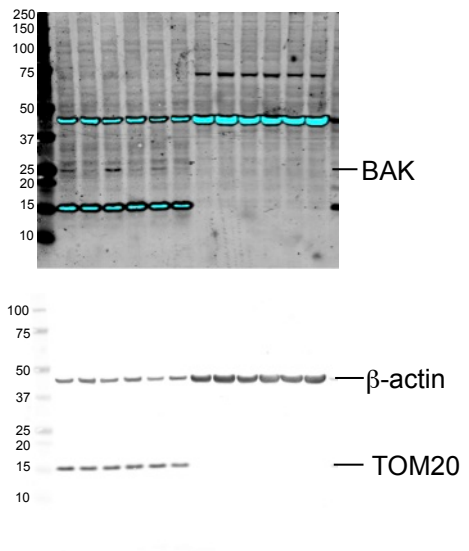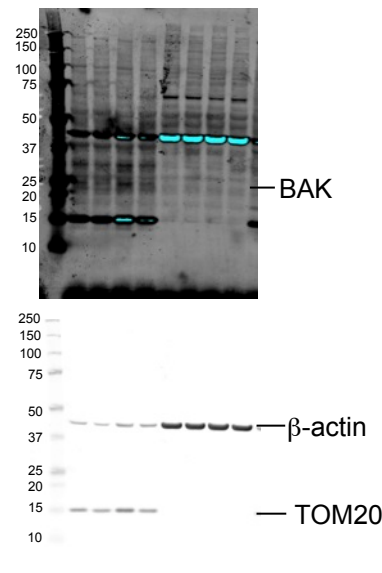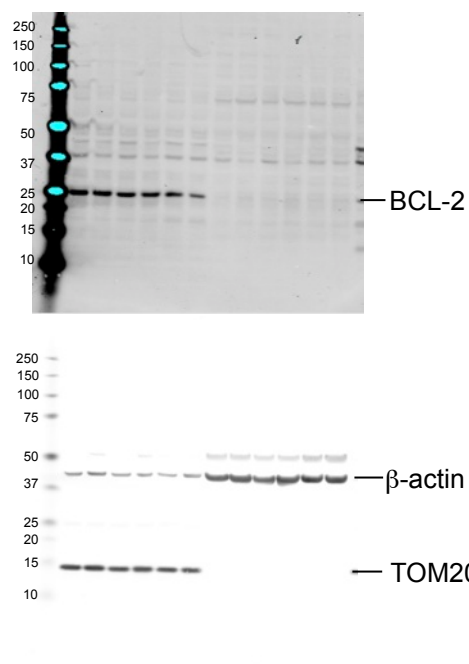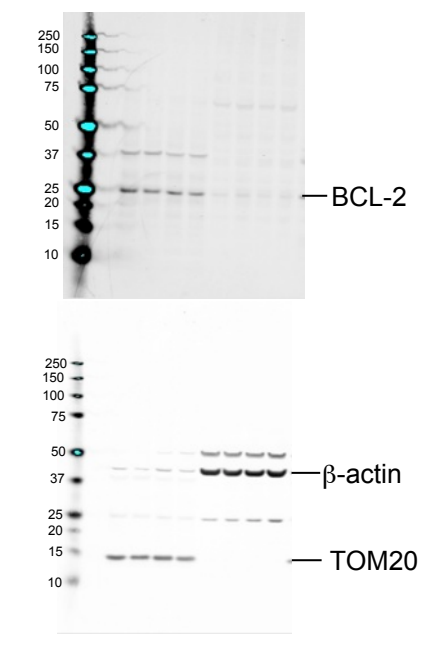



# Western blots from figure 4

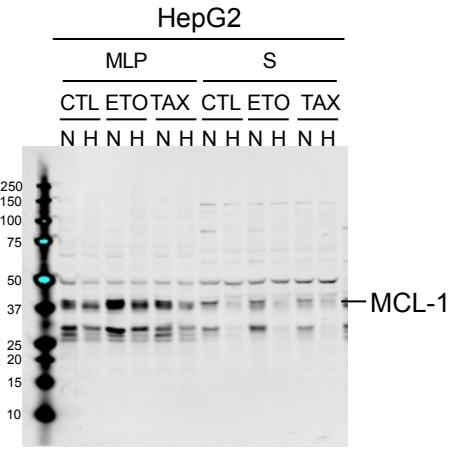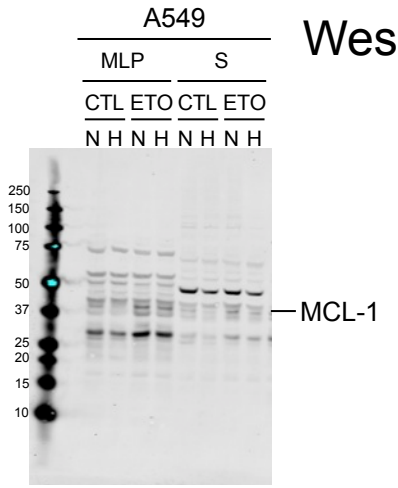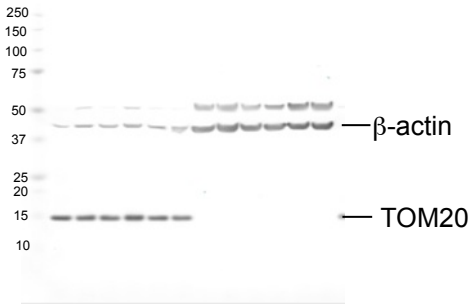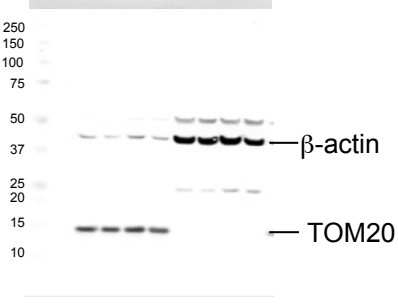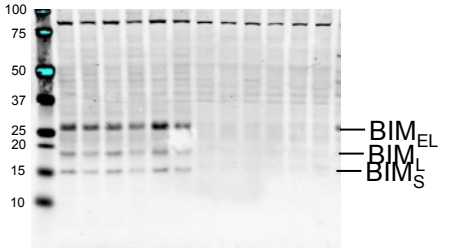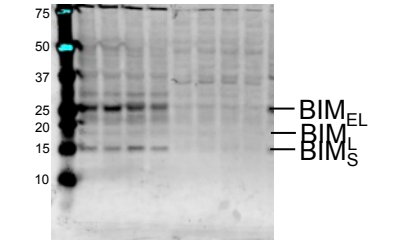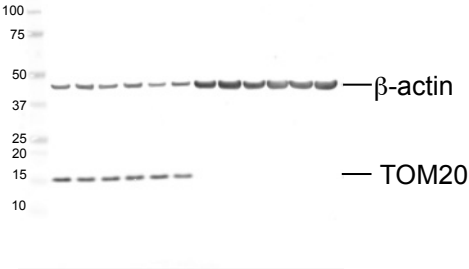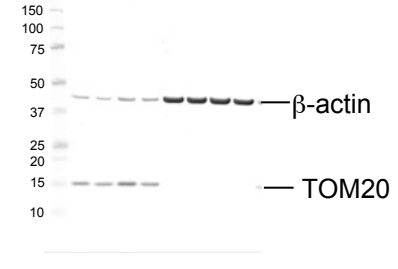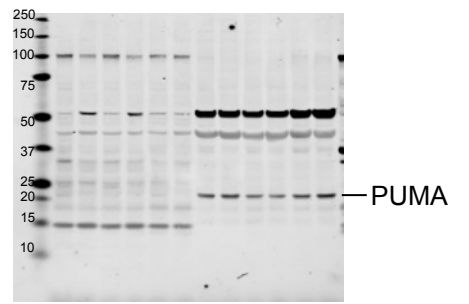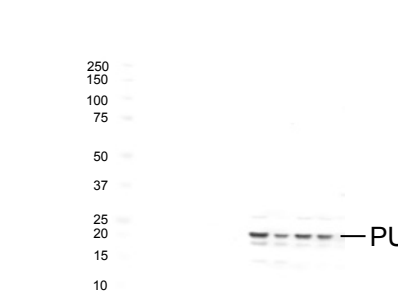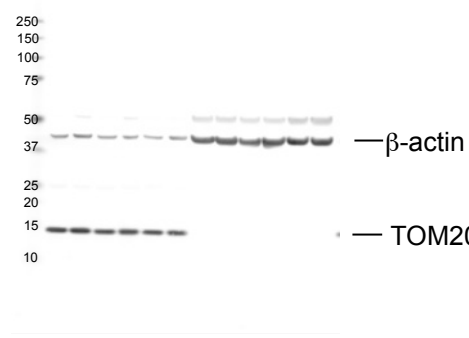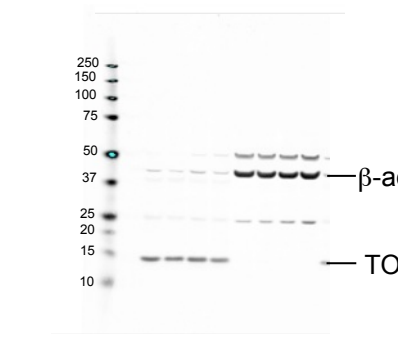

# Western blots from figure 4

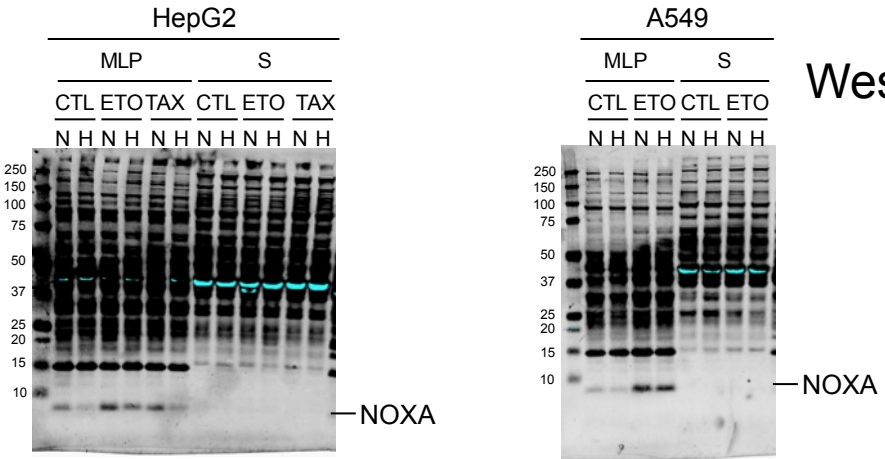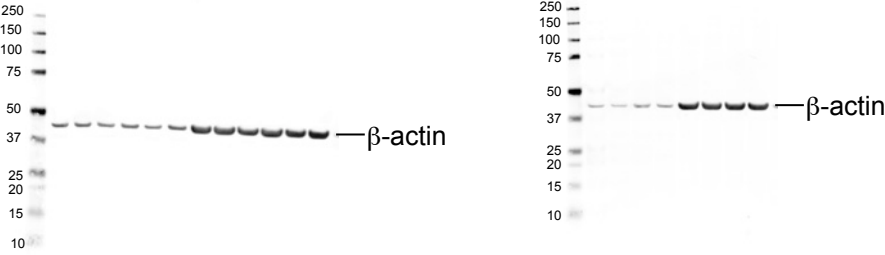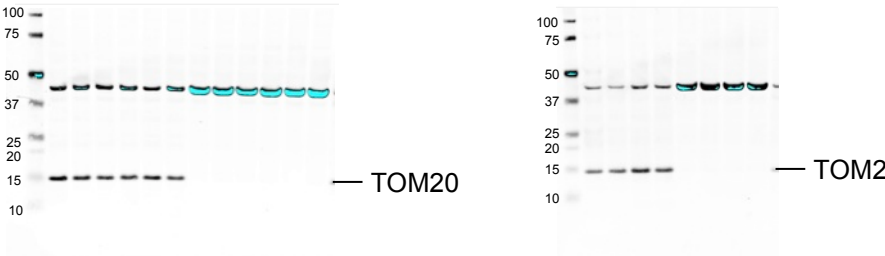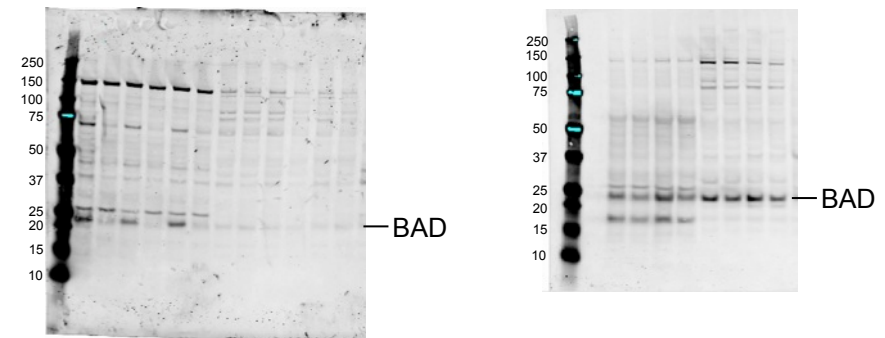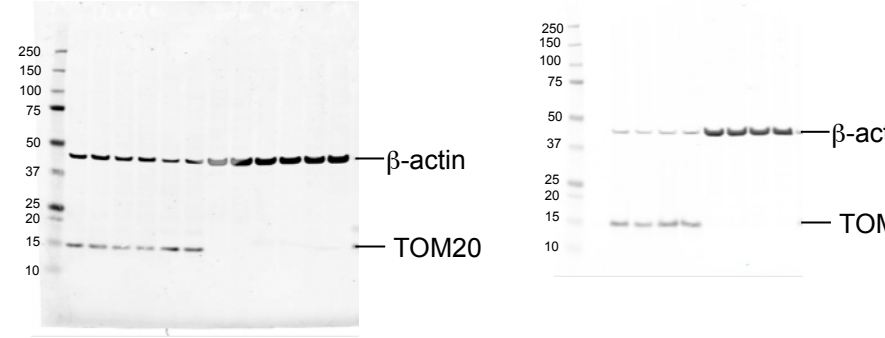



# Western blots from supplementary figure 2

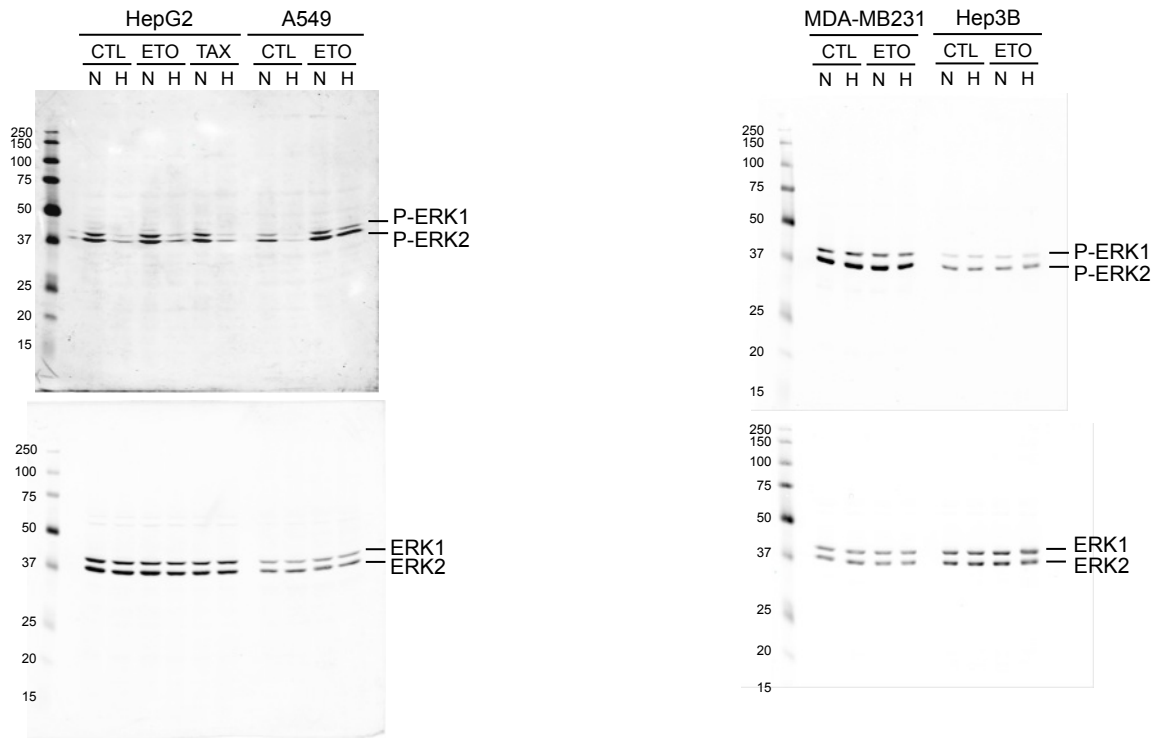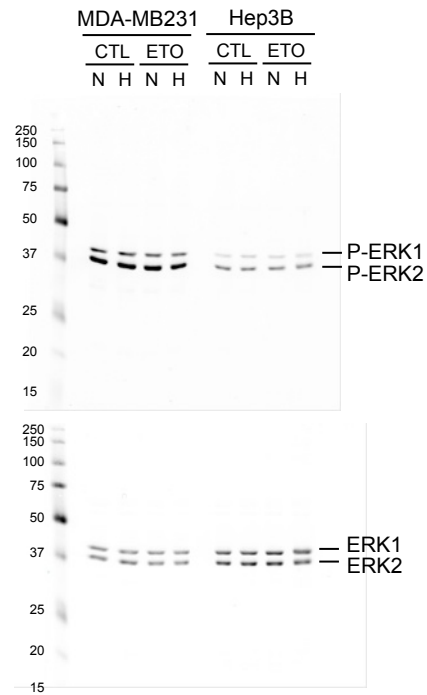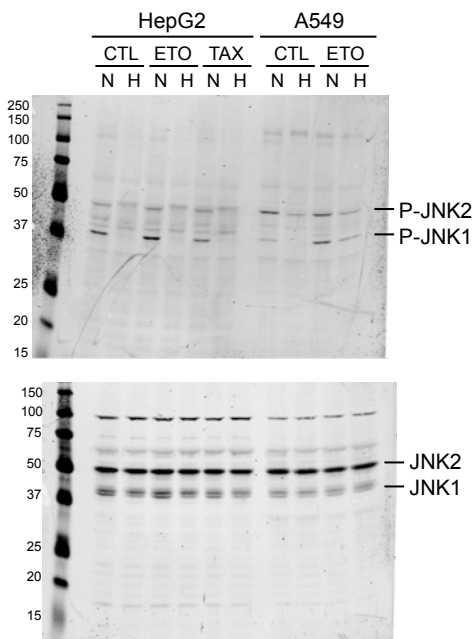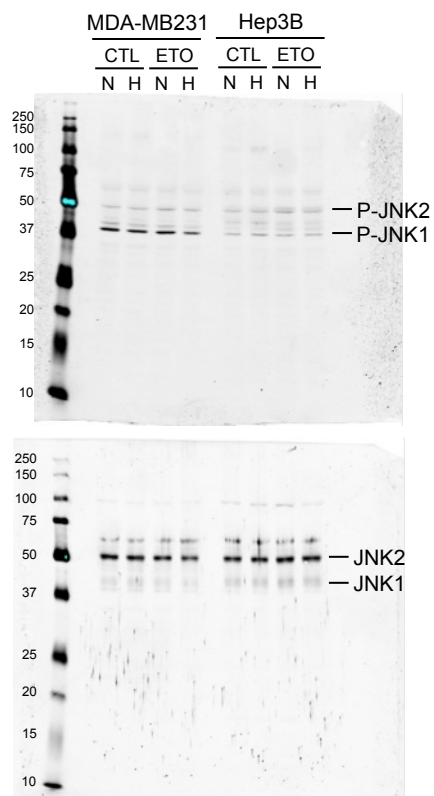

# Western blots from supplementary figure 3

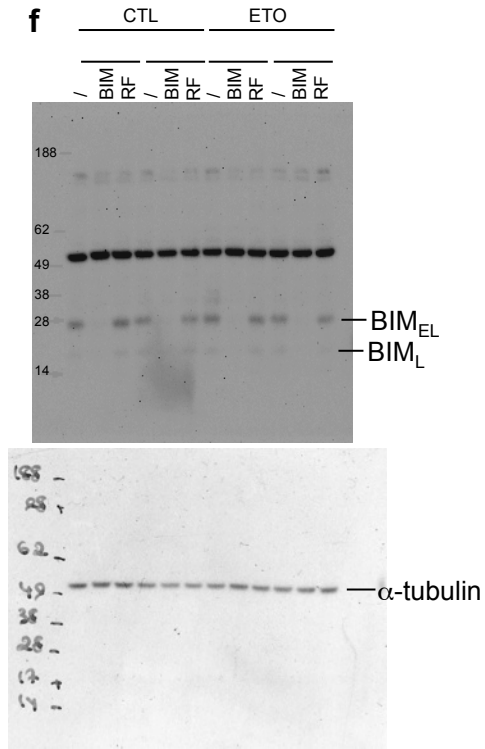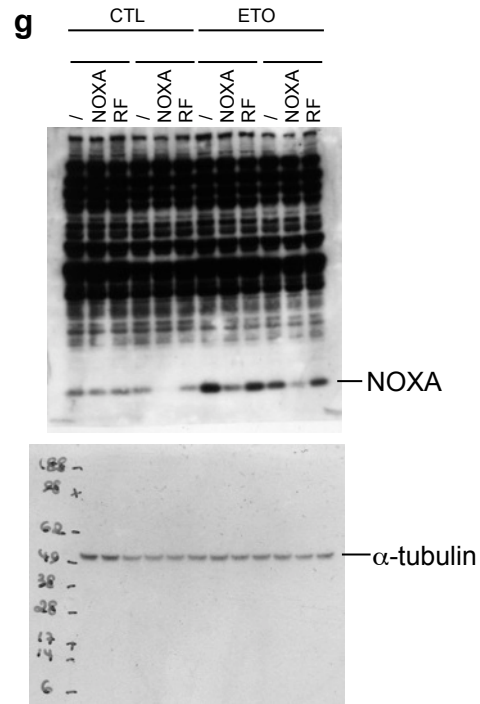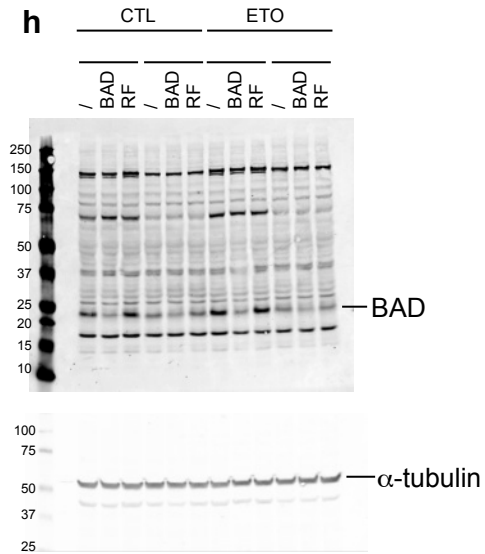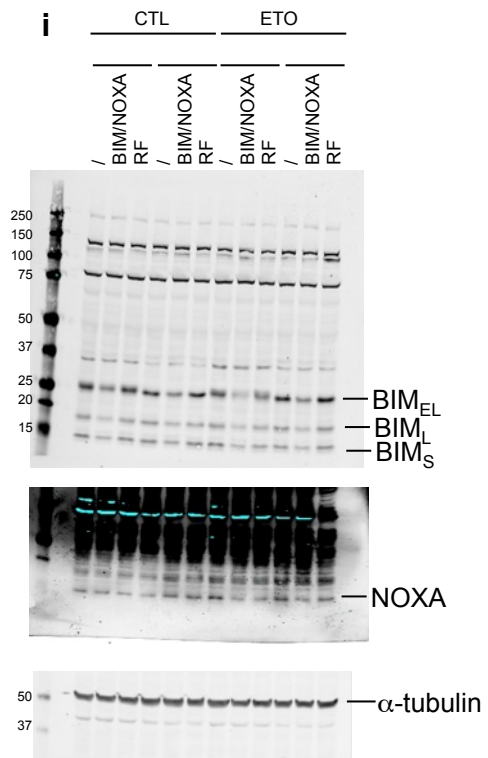

Supplement: pone.0047519.s001.pdf [file pone.0047519.s001.pdf]
