# Supplementary material for: Hypoxia-Induced Modulation of Apoptosis and BCL-2 Family Proteins in Different Cancer Cell Types
Source: PubMed Central journal article supplement (PMC3489905; doi:10.1371/journal.pone.0047519), 2012-11-05
Supplement: pone.0047519.s002.pdf [file pone.0047519.s002.pdf]

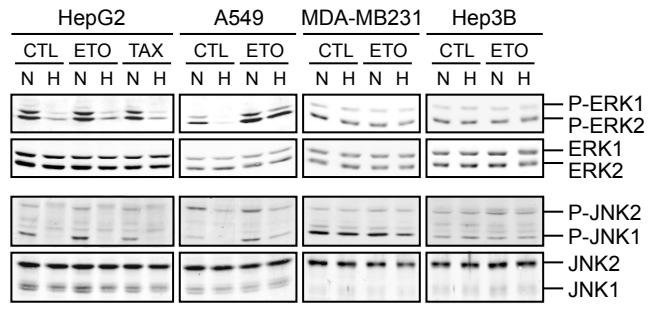

Supplementary figure 2
