# Supplementary material for: Hypoxia-Induced Modulation of Apoptosis and BCL-2 Family Proteins in Different Cancer Cell Types
Source: PubMed Central journal article supplement (PMC3489905; doi:10.1371/journal.pone.0047519), 2012-11-05
Supplement: pone.0047519.s004.pdf [file pone.0047519.s004.pdf]

|                      | forward primer                | reverse primer              |
|----------------------|-------------------------------|-----------------------------|
| <i>BAD</i>           | AGGATGAGTGACGAGTTTGTGGA       | GGAGCTTTGCCGCATCTG          |
| <i>BAK</i>           | CTTCGTGGTCGACTTCATGCT         | GGACCATTGCCCAAGTTCAG        |
| <i>BAX</i>           | TGTCGCCCTTTTCTACTTTGC         | GTCCAGCCCATGATGGTTCT        |
| <i>BCL2L1 (BIM)</i>  | AAAAGACCAAATGGCAAAGCA         | CTCTCCGCAGGCTGCAA           |
| <i>BIK</i>           | TGAAGAGGACCTGGACCCTATG        | CCTGAGGCTCACGTCCATCT        |
| <i>BIRC3</i>         | GTCCCAGGGTGAGGCAAGA           | TAAAGGCAGGGTCTCAGTATGCT     |
| <i>BNIP3</i>         | TTTGCTGGCCATCGGATT            | ACCAAGTCAGACTCCAGTTCTTCA    |
| <i>CASP10</i>        | CCACAGCTTTACCTCCCTGAAG        | CATTTCCACTTCGTCACATTATTG    |
| <i>CASP3</i>         | GAGGCCGACTTCTTGTATGCA         | CAAAGCGACTGGATGAACCA        |
| <i>DEDD2</i>         | TGGCACCTCCAGCTCTTCA           | CCGCTGCCGCTTGGT             |
| <i>LDHA</i>          | TGGCAGAGAGTATAATGAAGAATCTTAGG | GAAGACATCATCCTTTATTCCGTAAAG |
| <i>MCL-1</i>         | AAACGGGACTGGCTAGTTAAACAA      | TACTCCAGCAACACCTGCAAA       |
| <i>NALP1</i>         | GCTGGAAATACTCCCAAGGA          | CACACCAGAGTCTCATCTTTCTTGTC  |
| <i>PMAIP1 (NOXA)</i> | CGCGCAAGAACGCTCAA             | TGCCGGAAGTTCAGTTTGTCT       |
| <i>PUMA</i>          | ACGACCTCAACGCACAGTACG         | AGGAGTCCCATGATGAGATTGTACA   |
| <i>RPL13A</i>        | GCCTACAAGAAAGTTTGCCTATCTG     | TGAGCTGTTTCTTCTTCCGGTAGT    |
| <i>TRADD</i>         | GGGTCAGCCTGTAGTGAATCG         | CACCTTGCGCCATTTGAGA         |

## Supplementary table 1
