# Supplementary material for: Hypoxia-Induced Modulation of Apoptosis and BCL-2 Family Proteins in Different Cancer Cell Types
Source: PubMed Central journal article supplement (PMC3489905; doi:10.1371/journal.pone.0047519), 2012-11-05
Supplement: pone.0047519.s005.pdf [file pone.0047519.s005.pdf]

| FI 18S                       | HepG2 |       |      |       |      |       | A549 |      |       |       | MDA-MB-231 |        |        |        | Hep3B |       |       |       |       |
|------------------------------|-------|-------|------|-------|------|-------|------|------|-------|-------|------------|--------|--------|--------|-------|-------|-------|-------|-------|
| Detector                     | N     | H     | NE   | HE    | NT   | HT    | N    | H    | NE    | HE    | N          | H      | NE     | HE     | N     | H     | NE    | HE    |       |
| 18S-Hs99999901_s1            | 1,00  | 1,00  | 1,00 | 1,00  | 1,00 | 1,00  | 1,00 | 1,00 | 1,00  | 1,00  | 1,00       | 1,00   | 1,00   | 1,00   | 1,00  | 1,00  | 1,00  | 1,00  | 1,00  |
| ACTB-Hs99999903_m1           | 1,00  | 1,02  | 0,67 | 0,48  | 0,50 | 0,58  | 1,00 | 0,70 | 0,35  | 0,45  | 1,00       | 0,69   | 0,36   | 0,37   | 1,00  | 1,00  | 1,00  | 0,59  | 0,50  |
| APAF1-Hs00559441_m1          | 1,00  | 0,73  | 2,14 | 1,74  | 0,73 | 0,77  | 1,00 | 0,87 | 1,49  | 1,05  | 1,00       | 1,20   | 0,87   | 1,09   | 1,00  | 0,96  | 0,85  | 1,14  | 1,14  |
| BAD-Hs00188930_m1            | 1,00  | 0,64  | 1,32 | 0,93  | 1,62 | 1,01  | 1,00 | 0,59 | 0,47  | 0,43  | 1,00       | 0,54   | 1,18   | 0,87   | 1,00  | 0,75  | -     | -     | 1,14  |
| <b>BAK1-Hs00832876_g1</b>    | 1,00  | 0,65  | 1,65 | 1,21  | 0,84 | 0,51  | 1,00 | 0,35 | 1,38  | 1,08  | 1,00       | 0,82   | 0,67   | 0,65   | 1,00  | 0,77  | 0,86  | 0,59  | 0,59  |
| <b>BAX-Hs00751844_s1</b>     | 1,00  | 0,58  | 1,65 | 1,39  | 0,94 | 0,77  | 1,00 | 0,36 | 2,26  | 1,53  | 1,00       | 0,64   | 1,10   | 0,88   | 1,00  | 0,70  | 0,82  | 0,70  | 0,70  |
| <b>BBC3-Hs00248075_m1</b>    | 1,00  | 0,35  | 1,09 | 1,03  | 0,92 | 0,69  | 1,00 | 0,56 | 2,06  | 2,56  | 1,00       | 0,74   | 0,96   | 0,99   | 1,00  | 0,57  | 0,87  | 0,82  | 0,82  |
| BCAP31-Hs01036137_m1         | 1,00  | 0,94  | 1,13 | 0,74  | 0,87 | 0,94  | 1,00 | 0,65 | 0,53  | 0,73  | 1,00       | 0,91   | 0,91   | 0,88   | 1,00  | 1,08  | 0,89  | 0,88  | 0,88  |
| BCL10-Hs00961847_m1          | 1,00  | 0,58  | 1,21 | 1,47  | 0,49 | 0,43  | 1,00 | 0,73 | 1,41  | 3,88  | 1,00       | 1,86   | 1,28   | 3,06   | 1,00  | 1,09  | 1,91  | 2,86  | 2,86  |
| BCL2A1-Hs00187845_m1         | 1,00  | 0,74  | 1,09 | 1,02  | 0,49 | 0,40  | 1,00 | 1,92 | 10,22 | 9,48  | 1,00       | 2,38   | 0,82   | 5,33   | -     | -     | -     | -     | -     |
| BCL2-Hs00608023_m1           | 1,00  | 1,61  | 1,95 | -     | 1,86 | 3,03  | 1,00 | 0,33 | 0,21  | 0,07  | 1,00       | 0,39   | 0,96   | 0,83   | 1,00  | 1,95  | 2,26  | 5,43  | 5,43  |
| BCL2L10-Hs00368095_m1        | -     | -     | -    | -     | -    | -     | -    | -    | -     | -     | -          | -      | -      | -      | -     | -     | -     | -     | -     |
| <b>BCL2L11-Hs00708019_s1</b> | 1,00  | 0,50  | 1,27 | 0,63  | 1,10 | 0,64  | 1,00 | 0,91 | 0,59  | 1,04  | 1,00       | 0,48   | 2,61   | 2,58   | 1,00  | 0,86  | 1,67  | 1,94  | 1,94  |
| BCL2L13-Hs00209789_m1        | 1,00  | 0,60  | 1,09 | 0,76  | 1,44 | 1,08  | 1,00 | 0,42 | 0,52  | 0,30  | 1,00       | 0,67   | 0,63   | 0,51   | 1,00  | 0,84  | 0,62  | 0,71  | 0,71  |
| BCL2L14-Hs00373302_m1        | 1,00  | 0,20  | 0,32 | 0,49  | 0,48 | 0,20  | -    | -    | -     | -     | 1,00       | -      | 4,41   | 3,59   | 1,00  | 0,86  | 1,61  | 2,27  | 2,27  |
| BCL2L1-Hs00169141_m1         | 1,00  | 0,82  | 0,75 | 1,15  | 1,21 | 1,69  | 1,00 | 0,82 | 0,50  | 0,52  | 1,00       | 0,92   | 0,28   | 0,24   | 1,00  | 1,60  | 0,23  | 0,34  | 0,34  |
| BCL2L2-Hs00187848_m1         | 1,00  | 0,88  | 0,95 | 0,76  | 2,04 | 1,40  | 1,00 | 0,56 | 0,47  | 0,75  | 1,00       | 463,62 | 638,55 | 775,57 | 1,00  | 0,56  | 0,54  | 0,66  | 0,66  |
| BCL3-Hs00180403_m1           | 1,00  | 1,17  | 0,84 | 1,18  | 1,10 | 1,02  | 1,00 | 0,90 | 0,53  | 0,52  | 1,00       | 0,52   | 0,34   | 0,41   | 1,00  | 1,22  | 0,47  | 0,45  | 0,45  |
| BID-Hs00609632_m1            | 1,00  | 0,76  | 0,97 | 0,57  | 0,87 | 0,67  | 1,00 | 0,52 | 0,35  | 0,58  | 1,00       | 1,21   | 0,70   | 0,93   | 1,00  | 0,60  | 0,46  | 0,49  | 0,49  |
| <b>BIK-Hs00154189_m1</b>     | 1,00  | 0,30  | 1,49 | 0,70  | 1,07 | 0,40  | 1,00 | 0,53 | 1,40  | 1,42  | 1,00       | 0,65   | 4,25   | 2,95   | 1,00  | 0,28  | 0,62  | 0,44  | 0,44  |
| BIRC1-Hs01847653_s1          | 1,00  | 1,92  | 0,44 | 0,45  | 2,86 | 2,31  | 1,00 | -    | 2,88  | 11,54 | 1,00       | 0,61   | 0,02   | 0,14   | 1,00  | 1,40  | 1,57  | 2,28  | 2,28  |
| BIRC2-Hs00236911_m1          | 1,00  | 0,69  | 0,55 | 0,57  | 1,06 | 0,77  | 1,00 | 0,81 | 0,69  | 0,60  | 1,00       | 1,72   | 1,17   | 1,27   | 1,00  | 1,21  | 0,51  | 1,01  | 1,01  |
| <b>BIRC3-Hs00985031_g1</b>   | 1,00  | 1,21  | 0,54 | 0,98  | 0,50 | 0,55  | 1,00 | 0,56 | 0,78  | 0,65  | 1,00       | 1,07   | 1,10   | 2,14   | 1,00  | 2,01  | 0,58  | 1,03  | 1,03  |
| BIRC4-Hs00745222_s1          | 1,00  | 0,68  | 0,85 | 0,66  | 0,67 | 0,60  | 1,00 | 0,64 | 0,80  | 0,51  | 1,00       | 0,79   | 0,60   | 0,62   | 1,00  | 0,88  | 0,65  | 0,67  | 0,67  |
| BIRC5-Hs00977611_g1          | 1,00  | 0,50  | 0,83 | 0,49  | 1,20 | 0,77  | 1,00 | 0,47 | 0,08  | 0,05  | 1,00       | 0,65   | 0,99   | 0,70   | 1,00  | 0,83  | 1,61  | 1,27  | 1,27  |
| BIRC6-Hs00212288_m1          | 1,00  | 0,69  | 0,85 | 0,62  | 0,96 | 0,85  | 1,00 | 0,68 | 0,43  | 0,59  | 1,00       | 0,91   | 0,33   | 0,31   | 1,00  | 0,89  | 0,24  | 0,21  | 0,21  |
| BIRC7-Hs00223384_m1          | 1,00  | 6,51  | 7,77 | 13,91 | 0,76 | 7,52  | 1,00 | 3,20 | 0,98  | 1,95  | -          | -      | -      | -      | -     | -     | -     | -     | -     |
| BIRC8-Hs01057786_s1          | 1,00  | 1,79  | 0,34 | -     | 1,28 | 1,92  | 1,00 | -    | 0,50  | 0,56  | 1,00       | 0,60   | 0,07   | 0,22   | 1,00  | 0,45  | 1,21  | 0,21  | 0,21  |
| BNIP3-Hs00969291_m1          | 1,00  | 5,74  | 0,82 | 4,97  | 0,88 | 6,47  | 1,00 | 3,88 | 0,89  | 5,19  | 1,00       | 13,12  | 1,56   | 9,31   | 1,00  | 12,23 | 1,35  | 10,35 | 10,35 |
| BNIP3L-Hs00188949_m1         | 1,00  | 12,80 | 2,42 | 13,15 | 1,02 | 11,74 | 1,00 | 3,04 | 0,46  | 2,58  | 1,00       | 4,38   | 0,74   | 1,89   | 1,00  | 14,48 | 1,93  | 15,23 | 15,23 |
| BOK-Hs00261296_m1            | 1,00  | 0,95  | 0,74 | 0,96  | 0,78 | 1,17  | 1,00 | 0,97 | 0,32  | 0,99  | 1,00       | 0,63   | 0,94   | 1,38   | 1,00  | 0,84  | 0,65  | 0,90  | 0,90  |
| CARD15-Hs00223394_m1         | 1,00  | 3,03  | 6,32 | 3,03  | 1,73 | 2,50  | 1,00 | -    | 0,65  | 1,51  | -          | -      | -      | -      | -     | -     | -     | -     | -     |
| CARD4-Hs00196075_m1          | 1,00  | 0,30  | 0,97 | 0,45  | 0,73 | 0,44  | 1,00 | 0,66 | 0,58  | 0,54  | 1,00       | 0,54   | 1,28   | 1,19   | 1,00  | 1,13  | 2,79  | 1,53  | 1,53  |
| CARD6-Hs00261581_m1          | -     | -     | -    | -     | -    | -     | 1,00 | 0,38 | 2,59  | 12,45 | 1,00       | 1,12   | 2,38   | 4,12   | -     | -     | -     | -     | -     |
| CARD9-Hs00364485_m1          | 1,00  | 0,70  | 0,73 | 0,13  | 1,74 | 0,88  | -    | -    | -     | -     | 1,00       | -      | 0,41   | 1,35   | 1,00  | 0,45  | 1,58  | 0,87  | 0,87  |
| <b>CASP10-Hs00107902_m1</b>  | 1,00  | 0,40  | 1,05 | 0,59  | 0,61 | 0,54  | 1,00 | 0,45 | 1,34  | 1,37  | 1,00       | 0,56   | 1,21   | 0,89   | 1,00  | 1,27  | 1,79  | 1,72  | 1,72  |
| CASP14-Hs00201637_m1         | -     | -     | -    | -     | -    | -     | -    | -    | -     | -     | -          | -      | -      | -      | -     | -     | -     | -     | -     |
| CASP1-Hs00354836_m1          | -     | -     | -    | -     | -    | -     | 1,00 | 0,30 | 6,72  | 2,24  | 1,00       | 0,21   | 2,67   | 1,57   | 1,00  | 0,32  | 0,45  | 0,48  | 0,48  |
| CASP2-Hs00892481_m1          | 1,00  | 0,43  | 0,89 | 0,75  | 0,82 | 0,45  | 1,00 | 0,43 | 0,30  | 0,19  | 1,00       | 0,69   | 1,14   | 1,00   | 1,00  | 0,83  | 1,24  | 1,24  | 1,24  |
| <b>CASP3-Hs00263337_m1</b>   | 1,00  | 0,43  | 0,88 | 0,39  | 0,69 | 0,34  | 1,00 | 0,34 | 0,56  | 0,77  | 1,00       | 0,70   | 1,58   | 1,73   | 1,00  | 0,59  | 1,21  | 1,43  | 1,43  |
| CASP4-Hs01031947_m1          | 1,00  | 0,61  | 0,94 | 0,46  | 0,49 | 0,49  | 1,00 | 0,60 | 0,83  | 1,18  | 1,00       | 0,75   | 2,16   | 2,38   | 1,00  | 1,35  | 1,13  | 1,56  | 1,56  |
| CASP5-Hs00362072_m1          | 1,00  | -     | -    | -     | -    | -     | -    | -    | -     | -     | -          | -      | -      | -      | -     | -     | -     | -     | -     |
| CASP6-Hs00154250_m1          | 1,00  | 0,43  | 1,88 | 0,93  | 0,84 | 0,53  | 1,00 | 0,60 | 0,60  | 0,74  | 1,00       | 0,64   | 0,90   | 1,11   | 1,00  | 0,64  | 0,77  | 1,15  | 1,15  |
| CASP7-Hs00169152_m1          | 1,00  | 0,43  | 1,05 | 0,74  | 0,85 | 0,48  | 1,00 | 0,71 | 0,81  | 0,56  | 1,00       | 0,73   | 1,82   | 1,59   | 1,00  | 0,70  | 1,91  | 1,90  | 1,90  |
| CASP8AP2-Hs01594281_m1       | 1,00  | 0,73  | 0,71 | 0,57  | 0,82 | 0,51  | 1,00 | 0,47 | 0,36  | 0,49  | 1,00       | 0,62   | 1,47   | 1,63   | 1,00  | 0,89  | 1,06  | 1,32  | 1,32  |
| CASP8-Hs01018151_m1          | 1,00  | 0,43  | 1,00 | 0,60  | 0,80 | 0,38  | 1,00 | 0,65 | 0,88  | 0,52  | 1,00       | 0,80   | 0,78   | 0,84   | 1,00  | 0,93  | 1,03  | 1,46  | 1,46  |
| CASP9-Hs00154260_m1          | -     | -     | -    | -     | -    | -     | -    | -    | -     | -     | 1,00       | 0,59   | -      | 1,16   | 1,00  | 0,74  | 1,84  | 1,46  | 1,46  |
| CFLAR-Hs00153439_m1          | 1,00  | 0,61  | 1,19 | 0,77  | 0,67 | 0,60  | 1,00 | 0,70 | 0,71  | 1,19  | 1,00       | 0,87   | 0,94   | 0,99   | 1,00  | 0,84  | 0,60  | 0,68  | 0,68  |
| CHUK-Hs00989502_m1           | 1,00  | 0,48  | 1,17 | 0,78  | 0,65 | 0,56  | 1,00 | 0,44 | 0,74  | 0,79  | 1,00       | 0,50   | 1,50   | 1,40   | 1,00  | 0,60  | 0,84  | 0,76  | 0,76  |
| CRADD-Hs01011159_g1          | 1,00  | 1,01  | 1,35 | 1,59  | 1,06 | 1,45  | 1,00 | 0,75 | 0,60  | 0,84  | 1,00       | 1,11   | 0,28   | 0,36   | 1,00  | 0,89  | 0,50  | 0,50  | 0,50  |
| DAPK1-Hs00234480_m1          | 1,00  | 0,59  | 0,92 | 0,63  | 0,74 | 0,61  | 1,00 | 1,75 | 0,37  | 1,40  | -          | -      | -      | -      | 1,00  | 1,79  | 0,22  | 0,32  | 0,32  |
| <b>DEDD2-Hs00370206_m1</b>   | 1,00  | 1,08  | 2,66 | 1,99  | 1,14 | 0,96  | 1,00 | 0,82 | 1,31  | 1,29  | 1,00       | 0,97   | 1,54   | 1,88   | 1,00  | 1,59  | 2,94  | 2,51  | 2,51  |
| DEDD-Hs00172768_m1           | 1,00  | 0,63  | 1,73 | 1,28  | 1,05 | 0,65  | 1,00 | 0,64 | 0,36  | 0,45  | 1,00       | 0,71   | 0,87   | 0,97   | 1,00  | 0,80  | 1,45  | 1,46  | 1,46  |
| DIABLO-Hs00219876_m1         | 1,00  | 0,89  | 1,01 | 0,92  | 0,91 | 0,79  | 1,00 | 0,73 | 0,66  | 0,86  | 1,00       | 0,84   | 1,27   | 1,16   | 1,00  | 0,86  | 1,18  | 1,50  | 1,50  |
| ESRRB1-Hs00215973_m1         | 1,00  | 0,45  | 0,51 | 0,48  | 1,26 | 0,78  | 1,00 | 0,46 | 1,30  | 0,95  | 1,00       | 0,59   | 0,83   | 0,68   | 1,00  | -     | 18,19 | 11,03 | 11,03 |
| FADD-Hs00538709_m1           | 1,00  | 0,64  | 1,05 | 0,85  | 0,83 | 0,80  | 1,00 | 0,55 | 0,37  | 0,57  | 1,00       | 0,49   | 0,46   | 0,65   | 1,00  | 0,60  | 0,84  | 0,86  | 0,86  |
| FAS-Hs00236330_m1            | 1,00  | 0,28  | 3,01 | 1,20  | 1,15 | 0,39  | 1,00 | 0,37 | 4,32  | 2,92  | 1,00       | 1,16   | 1,26   | 1,58   | -     | -     | -     | -     | -     |
| FASLG-Hs00181225_m1          | -     | -     | -    | -     | -    | -     | -    | -    | -     | -     | 1,00       | 0,24   | 0,28   | 0,89   | 1,00  | 1,01  | 8,35  | 3,69  | 3,69  |
| GAPDH-Hs99999905_m1          | 1,00  | 1,84  | 0,91 | 1,96  | 1,00 | 2,23  | 1,00 | 1,43 | 0,48  | 1,22  | 1,00       | 1,79   | 0,91   | 1,53   | 1,00  | 2,83  | 1,25  | 3,22  | 3,22  |
| HIP1-Hs00193477_m1           | 1,00  | 0,57  | 1,86 | 0,83  | 2,02 | 1,31  | 1,00 | 1,06 | 0,25  | 0,42  | 1,00       | 0,56   | 0,71   | 0,81   | 1,00  | 1,10  | 0,53  | 0,56  | 0,56  |
| HRK-Hs00705213_s1            | 1,00  | 0,51  | 0,12 | 0,12  | 0,12 | 0,12  | 1,00 | 0,12 | 0,12  | 0,12  | 1,00       | 0,40   | 0,12   | 0,32   | 1,00  | 1,10  | 0,49  | 0,70  | 0,70  |
| HTRA2-Hs00376860_g1          | 1,00  | 0,40  | 0,86 | 0,45  | 0,58 | 0,50  | 1,00 | 0,49 | 0,68  | 0,62  | 1,00       | 0,53   | 1,04   | 0,92   | 1,00  | 0,58  | 0,91  | 0,66  | 0,66  |
| ICEBERG-Hs01043258_m1        | -     | -     | -    | -     | -    | -     | -    | -    | -     | -     | -          | -      | -      | -      | -     | -     | -     | -     | -     |
| IKBK-Hs00395088_m1           | 1,00  | 0,59  | 1,31 | 0,71  | 0,84 | 0,53  | 1,00 | 0,52 | 0,68  | 0,57  | 1,00       | 0,92   | 0,53   | 0,60   | 1,00  | 0,76  | 0,66  | 0,34  | 0,34  |
| IKBKE-Hs01063858_m1          | 1,00  | 0,74  | 0,55 | 0,45  | 1,11 | 1,01  | 1,00 | 0,81 | 0,45  | 0,86  | 1,00       | 1,05   | 0,70   | 0,90   | 1,00  | 0,96  | 0,42  | 0,38  | 0,38  |
| IKBK-G-Hs00175318_m          |       |       |      |       |      |       |      |      |       |       |            |        |        |        |       |       |       |       |       |
