# Supplementary material for: Hypoxia-Induced Modulation of Apoptosis and BCL-2 Family Proteins in Different Cancer Cell Types
Source: PubMed Central journal article supplement (PMC3489905; doi:10.1371/journal.pone.0047519), 2012-11-05
Supplement: pone.0047519.s006.pdf [file pone.0047519.s006.pdf]

|                      |        | HepG2       |             |             |             |             |             | A549        |             |             |             | MDA-MB231   |             |             |             | Hep3B       |             |             |             |
|----------------------|--------|-------------|-------------|-------------|-------------|-------------|-------------|-------------|-------------|-------------|-------------|-------------|-------------|-------------|-------------|-------------|-------------|-------------|-------------|
|                      |        | N           | H           | NE          | HE          | NT          | HT          | N           | H           | NE          | HE          | N           | H           | NE          | HE          | N           | H           | NE          | HE          |
| <b>BAK</b>           | TLDA   | 1,00        | 0,65        | 1,65        | 1,21        | 0,84        | 0,51        | 1,00        | 0,35        | 1,38        | 1,08        | 1,00        | 0,82        | 0,67        | 0,65        | 1,00        | 0,77        | 0,86        | 0,59        |
|                      | RT-PCR | 1,00 ± 0,15 | 0,43 ± 0,12 | 1,78 ± 0,46 | 1,25 ± 0,26 | 0,57 ± 0,30 | 0,41 ± 0,10 | 1,00 ± 0,04 | 0,43 ± 0,02 | 2,11 ± 0,29 | 1,39 ± 0,28 | 1,00 ± 0,17 | 0,61 ± 0,08 | 1,41 ± 0,21 | 0,96 ± 0,22 | 1,00 ± 0,23 | 0,81 ± 0,13 | 1,22 ± 0,25 | 0,86 ± 0,16 |
| <b>BAX</b>           | TLDA   | 1,00        | 0,58        | 1,65        | 1,39        | 0,94        | 0,77        | 1,00        | 0,36        | 2,26        | 1,53        | 1,00        | 0,64        | 1,10        | 0,88        | 1,00        | 0,70        | 0,82        | 0,70        |
|                      | RT-PCR | 1,00 ± 0,13 | 0,73 ± 0,11 | 1,43 ± 0,33 | 1,15 ± 0,26 | 0,91 ± 0,17 | 0,70 ± 0,17 | 1,00 ± 0,11 | 0,54 ± 0,14 | 3,02 ± 0,56 | 2,20 ± 0,58 | 1,00 ± 0,35 | 0,69 ± 0,24 | 1,00 ± 0,34 | 0,85 ± 0,30 | 1,00 ± 0,44 | 0,70 ± 0,11 | 0,93 ± 0,42 | 0,55 ± 0,15 |
| <b>BBC3 = PUMA</b>   | TLDA   | 1,00        | 0,35        | 1,09        | 1,03        | 0,92        | 0,69        | 1,00        | 0,56        | 2,06        | 2,56        | 1,00        | 0,74        | 0,96        | 0,99        | 1,00        | 0,57        | 0,87        | 0,82        |
|                      | RT-PCR | 1,00 ± 0,24 | 0,77 ± 0,30 | 2,29 ± 0,67 | 2,20 ± 0,39 | 0,94 ± 0,14 | 0,90 ± 0,28 | 1,00 ± 0,44 | 0,51 ± 0,14 | 1,93 ± 1,57 | 1,95 ± 0,22 | 1,00 ± 0,21 | 0,76 ± 0,10 | 1,00 ± 0,33 | 0,96 ± 0,49 | 1,00 ± 0,41 | 1,06 ± 0,27 | 1,08 ± 0,40 | 1,01 ± 0,22 |
| <b>BCL2L1 = BIM</b>  | TLDA   | 1,00        | 0,50        | 1,27        | 0,63        | 1,10        | 0,64        | 1,00        | 0,91        | 0,59        | 1,04        | 1,00        | 0,48        | 2,61        | 2,58        | 1,00        | 0,86        | 1,67        | 1,94        |
|                      | RT-PCR | 1,00 ± 0,48 | 0,54 ± 0,20 | 1,03 ± 0,48 | 0,70 ± 0,40 | 0,94 ± 0,43 | 0,50 ± 0,18 | 1,00 ± 0,64 | 0,77 ± 0,43 | 1,44 ± 0,55 | 0,98 ± 0,34 | 1,00 ± 0,38 | 0,77 ± 0,21 | 3,80 ± 0,77 | 2,28 ± 0,66 | 1,00 ± 0,14 | 0,90 ± 0,23 | 2,12 ± 1,08 | 1,35 ± 0,53 |
| <b>BIK</b>           | TLDA   | 1,00        | 0,30        | 1,49        | 0,70        | 1,07        | 0,40        | 1,00        | 0,53        | 1,40        | 1,42        | 1,00        | 0,65        | 4,25        | 2,95        | 1,00        | 0,28        | 0,62        | 0,44        |
|                      | RT-PCR | 1,00 ± 1,31 | 0,27 ± 0,37 | 1,16 ± 1,16 | 0,84 ± 0,89 | 0,89 ± 1,18 | 0,37 ± 0,51 | 1,00 ± 0,56 | 0,40 ± 0,29 | 3,73 ± 2,17 | 3,17 ± 2,14 | 1,00 ± 0,27 | 0,68 ± 0,15 | 6,78 ± 0,73 | 3,83 ± 1,02 | 1,00 ± 0,24 | 0,33 ± 0,16 | 1,40 ± 0,27 | 0,90 ± 0,23 |
| <b>BIRC3</b>         | TLDA   | 1,00        | 1,21        | 0,54        | 0,98        | 0,50        | 0,55        | 1,00        | 0,56        | 0,78        | 0,65        | 1,00        | 1,07        | 1,10        | 2,14        | 1,00        | 2,01        | 0,58        | 1,03        |
|                      | RT-PCR | 1,00 ± 0,32 | 1,29 ± 0,34 | 0,51 ± 0,19 | 0,57 ± 0,08 | 0,69 ± 0,02 | 0,60 ± 0,54 | 1,00 ± 0,79 | 0,62 ± 0,20 | 0,72 ± 0,39 | 0,68 ± 0,06 | 1,00 ± 0,26 | 0,65 ± 0,11 | 0,74 ± 0,02 | 0,75 ± 0,20 | 1,00 ± 0,18 | 2,34 ± 0,46 | 0,86 ± 0,15 | 1,47 ± 0,63 |
| <b>CASP10</b>        | TLDA   | 1,00        | 0,40        | 1,05        | 0,59        | 0,61        | 0,54        | 1,00        | 0,45        | 1,34        | 1,37        | 1,00        | 0,56        | 1,21        | 0,89        | 1,00        | 1,27        | 1,79        | 1,72        |
|                      | RT-PCR | 1,00 ± 0,66 | 0,45 ± 0,21 | 1,20 ± 0,59 | 0,69 ± 0,42 | 0,64 ± 0,57 | 0,45 ± 0,16 | 1,00 ± 0,06 | 0,64 ± 0,33 | 4,98 ± 0,38 | 2,67 ± 0,66 | 1,00 ± 0,09 | 0,33 ± 0,06 | 1,29 ± 0,30 | 0,70 ± 0,13 | 1,00 ± 0,32 | 0,88 ± 0,34 | 1,55 ± 0,40 | 0,94 ± 0,19 |
| <b>CASP3</b>         | TLDA   | 1,00        | 0,43        | 0,88        | 0,39        | 0,69        | 0,34        | 1,00        | 0,34        | 0,56        | 0,77        | 1,00        | 0,70        | 1,58        | 1,73        | 1,00        | 0,59        | 1,21        | 1,43        |
|                      | RT-PCR | 1,00 ± 0,90 | 0,29 ± 0,23 | 0,57 ± 0,63 | 0,21 ± 0,17 | 0,63 ± 0,53 | 0,23 ± 0,19 | 1,00 ± 0,54 | 0,53 ± 0,41 | 1,14 ± 0,80 | 0,91 ± 0,86 | 1,00 ± 0,18 | 0,66 ± 0,16 | 1,95 ± 0,40 | 1,36 ± 0,42 | 1,00 ± 0,06 | 0,53 ± 0,13 | 1,34 ± 0,38 | 0,89 ± 0,25 |
| <b>DEDD2</b>         | TLDA   | 1,00        | 1,08        | 2,66        | 1,99        | 1,14        | 0,96        | 1,00        | 0,82        | 1,31        | 1,29        | 1,00        | 0,97        | 1,54        | 1,88        | 1,00        | 1,59        | 2,94        | 2,51        |
|                      | RT-PCR | 1,00 ± 0,19 | 0,56 ± 0,28 | 1,34 ± 0,69 | 1,52 ± 0,47 | 1,09 ± 0,21 | 0,76 ± 0,10 | 1,00 ± 0,21 | 0,79 ± 0,21 | 2,09 ± 0,44 | 2,16 ± 0,65 | 1,00 ± 0,13 | 1,07 ± 0,09 | 1,86 ± 0,11 | 1,96 ± 0,08 | 1,00 ± 0,22 | 0,95 ± 0,29 | 2,40 ± 0,68 | 1,82 ± 0,54 |
| <b>MCL-1</b>         | TLDA   | 1,00        | 1,27        | 1,13        | 2,22        | 0,82        | 1,39        | 1,00        | 1,11        | 0,93        | 1,00        | 1,00        | 1,89        | 1,77        | 1,86        | 1,00        | 1,03        | 1,58        | 1,37        |
|                      | RT-PCR | 1,00 ± 1,08 | 1,14 ± 1,13 | 1,12 ± 0,62 | 1,36 ± 1,07 | 1,00 ± 0,96 | 1,25 ± 1,05 | 1,00 ± 0,57 | 0,90 ± 0,80 | 1,45 ± 0,90 | 1,03 ± 0,97 | 1,00 ± 0,19 | 1,52 ± 0,21 | 1,12 ± 0,53 | 1,15 ± 0,15 | 1,00 ± 0,57 | 0,86 ± 0,36 | 1,43 ± 0,67 | 0,90 ± 0,35 |
| <b>NALP1</b>         | TLDA   | 1,00        | 0,18        | 4,90        | 2,38        | 0,79        | -           | 1,00        | 1,04        | 9,51        | 15,6        | 1,00        | 1,14        | 0,89        | 1,22        | 1,00        | 1,94        | 1,67        | 1,75        |
|                      | RT-PCR | 1,00 ± 0,65 | 0,81 ± 0,61 | 2,48 ± 1,77 | 1,83 ± 1,59 | 2,07 ± 2,17 | 1,75 ± 1,71 | 1,00 ± 0,90 | 0,44 ± 0,29 | 17,3 ± 11,8 | 7,90 ± 5,27 | 1,00 ± 0,29 | 0,84 ± 0,07 | 0,85 ± 0,18 | 0,68 ± 0,07 | 1,00 ± 0,23 | 1,43 ± 0,29 | 0,86 ± 0,42 | 0,98 ± 0,60 |
| <b>PMAIP1 = NOXA</b> | TLDA   | 1,00        | 0,45        | 2,70        | 1,27        | 0,84        | 0,48        | 1,00        | 0,25        | 1,92        | 1,22        | 1,00        | 0,93        | 2,41        | 2,04        | 1,00        | 1,84        | 7,98        | 13,9        |
|                      | RT-PCR | 1,00 ± 0,30 | 0,28 ± 0,08 | 3,81 ± 0,56 | 1,51 ± 0,26 | 0,87 ± 0,87 | 0,42 ± 0,42 | 1,00 ± 0,21 | 0,54 ± 0,21 | 3,41 ± 1,12 | 2,57 ± 0,70 | 1,00 ± 0,26 | 0,62 ± 0,08 | 2,47 ± 0,54 | 1,46 ± 0,50 | 1,00 ± 0,32 | 0,57 ± 0,09 | 8,45 ± 6,58 | 5,36 ± 3,72 |
| <b>TRADD</b>         | TLDA   | 1,00        | 0,53        | 1,68        | 0,97        | 0,59        | 0,77        | 1,00        | 1,53        | 0,54        | 1,37        | 1,00        | 1,24        | 0,71        | 1,07        | 1,00        | 1,10        | 0,57        | 0,93        |
|                      | RT-PCR | 1,00 ± 0,23 | 0,81 ± 0,25 | 1,29 ± 0,24 | 0,88 ± 0,25 | 1,26 ± 0,48 | 1,01 ± 0,26 | 1,00 ± 0,25 | 1,42 ± 0,38 | 1,17 ± 0,61 | 1,04 ± 0,40 | 1,00 ± 0,11 | 1,06 ± 0,21 | 0,89 ± 0,08 | 0,94 ± 0,04 | 1,00 ± 0,11 | 1,10 ± 0,10 | 0,86 ± 0,16 | 0,86 ± 0,08 |

Supplementary table 3
